# Supplementary material
Source: HighWire-hosted journal article supplement (https://jnis.bmj.com/content/12/1/62)
Supplement: inline-supplementary-material-1 [file inline-supplementary-material-1.pdf]

**ONLINE SUPPLEMENT**

**Prospective Study on Embolization of Intracranial Aneurysms with the Pipeline™ Device:**

**The PREMIER Study One-Year Results**

**Supplemental Table I.** Summary of inclusion and exclusion criteria

| Inclusion Criteria                                                                                                                                                                                                                                                                                                                                                                                                                                                                                                                                                                                                                                  | Exclusion Criteria                                                                                                                                                                                                                                                                                                                                                                                                                                                                                                                                                                                                                                                                                                                                                                                                                                                |
|-----------------------------------------------------------------------------------------------------------------------------------------------------------------------------------------------------------------------------------------------------------------------------------------------------------------------------------------------------------------------------------------------------------------------------------------------------------------------------------------------------------------------------------------------------------------------------------------------------------------------------------------------------|-------------------------------------------------------------------------------------------------------------------------------------------------------------------------------------------------------------------------------------------------------------------------------------------------------------------------------------------------------------------------------------------------------------------------------------------------------------------------------------------------------------------------------------------------------------------------------------------------------------------------------------------------------------------------------------------------------------------------------------------------------------------------------------------------------------------------------------------------------------------|
| <ul style="list-style-type: none"> <li>▪ Age 22-80 years</li> <li>▪ Target aneurysm located in the:               <ul style="list-style-type: none"> <li>○ Internal carotid artery (up to the carotid terminus) or</li> <li>○ Vertebral artery (segment up to and including the posterior inferior cerebellar artery)</li> </ul> </li> <li>▪ Target aneurysm <math>\leq 12</math>mm</li> <li>▪ Target aneurysm had a parent vessel with diameter 1.5-5.0 mm distal/proximal to the target aneurysm</li> <li>▪ Target aneurysm neck <math>\geq 4</math>mm or dome to neck ratio <math>\leq 1.5</math></li> <li>▪ Pre-procedure PRU 60-200</li> </ul> | <ul style="list-style-type: none"> <li>▪ Intracranial implant in the area of the target aneurysm within the past 12 weeks</li> <li>▪ SAH in the past 30 days</li> <li>▪ Anatomy not appropriate for endovascular treatment</li> <li>▪ Major surgery in the last 30 days</li> <li>▪ History of irreversible bleeding disorder and/or presents with signs of active bleeding</li> <li>▪ Contraindication to treatment with the Pipeline™ device</li> <li>▪ Investigator determined that health of subject or validity of study outcomes may be compromised by subject's enrollment</li> <li>▪ Pregnant or breastfeeding women or women who wish to become pregnant during the length of study participation</li> <li>▪ Participated in another clinical trial during the follow-up period that could confound the treatment or outcomes of investigation</li> </ul> |

PRU: P2Y12 reaction units; SAH: subarachnoid hemorrhage

**Supplemental Table II.** Reasons for aneurysm treatment as described by PREMIER treating physicians

| <b>Reasons for aneurysm treatment PREMIER study</b> | <b>Rate of Patients with Factor,<br/>n (%) (N=141)</b> |
|-----------------------------------------------------|--------------------------------------------------------|
| Patient preference to be treated                    | 89 (63.1)                                              |
| Age                                                 | 36 (25.5)                                              |
| Familial history of aneurysm or SAH                 | 35 (24.8)                                              |
| Reduced QOL due to fear of rupture                  | 31 (22.0)                                              |
| Aneurysm multiplicity                               | 53 (37.6)                                              |
| Aneurysm location                                   | 41(29.1)                                               |
| Aneurysm irregularity or lobulation                 | 38 (27.0)                                              |
| Aneurysm size                                       | 20 (14.2)                                              |
| Aneurysm growth on serial imaging                   | 16 (11.3)                                              |

QOL=quality of life; SAH=subarachnoid hemorrhage

**Supplemental Table III.** Summary of reasons for aneurysm risk factors as described by PREMIER treating physicians

| <b>Risk factors</b>                 | <b>n (%) (N=141)</b> |
|-------------------------------------|----------------------|
| <i>Patient Risk Factors</i>         |                      |
| Patient preference to be treated    | 89 (63.1)            |
| Hypertension                        | 72 (51.1)            |
| Current cigarette smoking           | 41 (29.1)            |
| Age                                 | 36 (25.5)            |
| Familial history of aneurysm or SAH | 35 (24.8)            |
| Reduced QOL due to fear of rupture  | 31 (22.0)            |
| History of SAH                      | 14 (9.9)             |
| <i>Aneurysm Risk Factors</i>        |                      |
| Aneurysm multiplicity               | 53 (37.6)            |
| Aneurysm location                   | 41 (29.1)            |
| Aneurysm irregularity or lobulation | 38 (27.0)            |
| Aneurysm size                       | 20 (14.2)            |
| Aneurysm growth on serial imaging   | 16 (11.3)            |

QOL=Quality of life; SAH=subarachnoid hemorrhage
